# Supplementary material for: Human West Nile Meningo-Encephalitis in a Highly Endemic Country: A Complex Epidemiological Analysis on Biotic and Abiotic Risk Factors
Source: PubMed Central journal article supplement (PMC7664930; doi:10.3390/ijerph17218250), 2020-11-08
Supplement: ijerph-17-08250-s001.pdf [file ijerph-17-08250-s001.pdf]

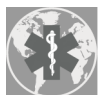

**Table S1.** Spearman’s correlation coefficient results between the number of human WNND cases for each year (2015–2019) and the abiotic predictors.

| Predictor                                                 | Value | 2015        | 2016       | 2017        | 2018       | 2019       | 2015–2019  |
|-----------------------------------------------------------|-------|-------------|------------|-------------|------------|------------|------------|
| Average altitude (m)                                      | Rho   | -0.07496351 | -0.1286847 | -0.1242232  | -0.1607161 | -0.1223553 | -0.2449468 |
|                                                           | S     | 5.794e+09   | 6083571849 | 6059524679  | 6256220288 | 6049456751 | 6710220813 |
|                                                           | p     | 2.28e-05    | 3.076e-13  | 1.975e-12   | <2.2e-16   | 4.219e-12  | <2.2e-16   |
| Annual average humidity (%/100)                           | Rho   | -0.04016418 | -0.1255573 | -0.0876694  | -0.1411441 | -0.1053015 | -0.2155756 |
|                                                           | S     | 5606449529  | 6066715699 | 5862501034  | 6150728048 | 5957537175 | 6551911258 |
|                                                           | p     | 0.02339     | 1.14e-12   | 7.193e-07   | 1.206e-15  | 2.554e-09  | <2.2e-16   |
| Surface of flowing water bodies (ha)                      | Rho   | 0.04504388  | 0.01898325 | 0.003637584 | 0.03657402 | 0.03322832 | 0.05754027 |
|                                                           | S     | 5147180988  | 5287646876 | 5370359490  | 5192833206 | 5210866417 | 5079825869 |
|                                                           | p     | 0.011       | 0.2841     | 0.8374      | 0.03899    | 0.06075    | 0.001157   |
| Surface of still water bodies (ha)                        | Rho   | 0.08180145  | 0.1181831  | 0.09991431  | 0.1275815  | 0.09129224 | 0.1841338  |
|                                                           | S     | 4949058927  | 4.753e+09  | 4851431213  | 4702305818 | 4897903882 | 4397490822 |
|                                                           | p     | 3.779e-06   | 2.207e-11  | 1.59e-08    | 4.901e-13  | 2.447e-07  | <2.2e-16   |
| Average temperature in spring (March to May) (degree C)   | Rho   | 0.07441398  | 0.1013378  | 0.1162005   | 0.1599574  | 0.08876406 | 0.2230996  |
|                                                           | S     | 4988877140  | 4843758752 | 4763649060  | 4527801055 | 4911530675 | 4187466876 |
|                                                           | p     | 2.617e-05   | 9.896e-09  | 4.748e-11   | <2.2e-16   | 5.216e-07  | <2.2e-16   |
| Average temperature in summer (June to August) (degree C) | Rho   | 0.07388091  | 0.1189022  | 0.1239292   | 0.1588872  | 0.1147463  | 0.2394872  |
|                                                           | S     | 4991750382  | 4749086975 | 4.722e+09   | 4533569309 | 4771487373 | 4099138126 |
|                                                           | p     | 2.99e-05    | 1.666e-11  | 2.227e-12   | <2.2e-16   | 8.263e-11  | <2.2e-16   |
| Average of maximal temperature for summer (degree C)      | Rho   | 0.07550537  | 0.1111877  | 0.1257269   | 0.1541404  | 0.09210693 | 0.2263494  |
|                                                           | S     | 4.983e+09   | 4790668297 | 4712302311  | 4559154465 | 4893512741 | 4.17e+09   |
|                                                           | p     | 1.987e-05   | 3.114e-10  | 1.063e-12   | <2.2e-16   | 1.909e-07  | <2.2e-16   |
| Average of annual precipitations (mm/ sq m)               | Rho   | -0.04833897 | -0.1211648 | -0.08098068 | -0.1395484 | -0.1062587 | -0.2158519 |
|                                                           | S     | 5650511356  | 6.043e+09  | 5826449065  | 6142127003 | 5962696560 | 6553400282 |
|                                                           | p     | 0.006353    | 6.804e-12  | 4.725e-06   | 2.524e-15  | 1.828e-09  | <2.2e-16   |

**Table S2.** Spearman's correlation coefficient between the number of human WNND cases for each year (2015-2019) and the biotic predictors.

| Predictor           | Value | 2015         | 2016         | 2017        | 2018       | 2019        | 2015-2019  |
|---------------------|-------|--------------|--------------|-------------|------------|-------------|------------|
| Human population    | Rho   | 0.08695938   | 0.1313478    | 0.1142014   | 0.1550048  | 0.09456008  | 0.1976989  |
|                     | S     | 4921257834   | 4.682e+09    | 4774424358  | 4554495319 | 4880290354  | 4324375586 |
|                     | p     | 8.843e-07    | 9.824e-14    | 1.015e-10   | <2.2e-16   | 8.927e-08   | <2.2e-16   |
| Horse population    | Rho   | -0.002917551 | 0.006935175  | -0.02885493 | 0.04544007 | -0.0138631  | 0.04435366 |
|                     | S     | 5405691447   | 5352585587   | 5545493051  | 5.145e+09  | 5464687573  | 5150901255 |
|                     | p     | 0.8692       | 0.6956       | 0.1034      | 0.01031    | 0.4341      | 0.01229    |
| Fowl population     | Rho   | -0.004626605 | -0.005662356 | -0.01842264 | 0.03663461 | 0.006818843 | 0.05233439 |
|                     | S     | 5414903191   | 5420485851   | 5489263347  | 5192506652 | 5353212611  | 5107885392 |
|                     | p     | 0.7941       | 0.7494       | 0.2986      | 0.03867    | 0.7004      | 0.003128   |
| Sparrow probability | Rho   | 0.082925     | 0.1070365    | 0.08433186  | 0.119439   | 0.05264705  | 0.1447979  |
|                     | S     | 4.943e+09    | 4.813e+09    | 4935420072  | 4746193840 | 5106200140  | 4609510424 |
|                     | p     | 2.774e-06    | 1.39e-09     | 1.873e-06   | 1.349e-11  | 0.002953    | <2.2e-16   |
| Dove probability    | Rho   | 0.08603096   | 0.1110499    | 0.1126401   | 0.1471729  | 0.100604    | 0.2005501  |
|                     | S     | 4926261993   | 4791410771   | 4782839439  | 4596709025 | 4847713899  | 4.309e+09  |
|                     | p     | 1.156e-06    | 3.275e-10    | 1.821e-10   | <2.2e-16   | 1.265e-08   | <2.2e-16   |
| Jackdaw probability | Rho   | 0.09021162   | 0.1258868    | 0.1468455   | 0.1887874  | 0.1240781   | 0.2515709  |
|                     | S     | 4903728371   | 4711440534   | 4598473546  | 4372408180 | 4721189170  | 4.034e+09  |
|                     | p     | 3.39e-07     | 9.947e-13    | <2.2e-16    | <2.2e-16   | 2.096e-12   | <2.2e-16   |
| Crow probability    | Rho   | 0.06464558   | 0.08531506   | 0.1004867   | 0.06913087 | 0.09111964  | 0.1338824  |
|                     | S     | 5041528452   | 4930120660   | 4848346093  | 5017352930 | 4898834199  | 4668344272 |
|                     | p     | 0.0002609    | 1.418e-06    | 1.315e-08   | 9.414e-05  | 2.578e-07   | 3.245e-14  |

**Table S3.** Annual cumulative presence for 2015-2019 [0-5] – abiotic predictors. Spearman's rank correlation.

| Predictor                                              | Value | 2015-2019  |
|--------------------------------------------------------|-------|------------|
| Average altitude (m)                                   | Rho   | -0.2444617 |
|                                                        | S     | 6707606431 |
|                                                        | p     | <2.2e-16   |
| Annual average humidity (%/100)                        | Rho   | -0.2159552 |
|                                                        | S     | 6.554e+09  |
|                                                        | p     | <2.2e-16   |
| Surface of flowing water bodies (ha)                   | Rho   | 0.05768525 |
|                                                        | S     | 5.079e+09  |
|                                                        | p     | 0.001124   |
| Surface of still water bodies (ha)                     | Rho   | 0.1838329  |
|                                                        | S     | 4399112790 |
|                                                        | p     | <2.2e-16   |
| Average temperature in spring (March–May) (degree C)   | Rho   | 0.221787   |
|                                                        | S     | 4194541752 |
|                                                        | p     | <2.2e-16   |
| Average temperature in summer (June–August) (degree C) | Rho   | 0.2385037  |
|                                                        | S     | 4104439048 |
|                                                        | p     | <2.2e-16   |
| Average of maximal temperature for summer (degree C)   | Rho   | 0.2250431  |
|                                                        | S     | 4.177e+09  |
|                                                        | p     | <2.2e-16   |
| Average of annual precipitations (mm/ sq m)            | Rho   | -0.2162213 |
|                                                        | S     | 6555391139 |
|                                                        | p     | <2.2e-16   |

**Table S4.** Annual cumulative presence for 2015-2019 [0-5]—Host predictors. Spearman's rank correlation rho.

| <b>Predictor</b>    | <b>Value</b> | <b>2015–2019</b> |
|---------------------|--------------|------------------|
| Human population    | Rho          | 0.1966031        |
|                     | S            | 4330281935       |
|                     | p            | <2.2e-16         |
| Horse population    | Rho          | 0.04486768       |
|                     | S            | 5148130673       |
|                     | p            | 0.01131          |
| Fowl population     | Rho          | 0.05209714       |
|                     | S            | 5109164161       |
|                     | p            | 0.003267         |
| Sparrow probability | Rho          | 0.1444536        |
|                     | S            | 4611366145       |
|                     | p            | 2.539e-16        |
| Dove probability    | Rho          | 0.1997721        |
|                     | S            | 4313201219       |
|                     | p            | <2.2e-16         |
| Jackdaw probability | Rho          | 0.2509094        |
|                     | S            | 4037572833       |
|                     | p            | <2.2e-16         |
| Crow probability    | Rho          | 0.1330848        |
|                     | S            | 4672643376       |
|                     | p            | 4.609e-14        |

**Table S5.** Spearman rank correlation coefficient (Rho values) for the human WNND cumulative presence (2015-2019) and the predictors, for the total number of human WNND cases for 2015-2019 and the predictors and the differences between them.

| <b>Predictor</b>                                        | <b>Rho value—cumulative presences</b> | <b>Rho value—total number of infections</b> | <b>Difference</b> |
|---------------------------------------------------------|---------------------------------------|---------------------------------------------|-------------------|
| Average altitude (m)                                    | -0.244461746                          | -0.244946792                                | 0.000485046       |
| Annual average humidity (%/100)                         | -0.215955233                          | -0.215575632                                | -0.000379602      |
| Surface of flowing water bodies (ha)                    | 0.057685252                           | 0.057540266                                 | 0.000144986       |
| Surface of still water bodies (ha)                      | 0.183832916                           | 0.184133839                                 | -0.000300924      |
| Average temperature in spring (March-May) (degree C)    | 0.221786966                           | 0.223099567                                 | -0.001312601      |
| Average temperature in summer (June -August) (degree C) | 0.238503714                           | 0.239487194                                 | -0.00098348       |
| Average of maximal temperature for summer (degree C)    | 0.22504314                            | 0.226349439                                 | -0.001306299      |
| Average of annual precipitations (mm/ sq m)             | -0.216221254                          | -0.21585189                                 | -0.000369364      |
| Human population                                        | 0.196603099                           | 0.197698904                                 | -0.001095805      |
| Horse population                                        | 0.044867681                           | 0.044353655                                 | 0.000514026       |
| Fowl population                                         | 0.052097135                           | 0.052334385                                 | -0.00023725       |
| Sparrow population                                      | 0.144453566                           | 0.144797857                                 | -0.000344292      |
| Dove population                                         | 0.199772083                           | 0.200550074                                 | -0.000777991      |
| Jackdaw population                                      | 0.250909398                           | 0.251570894                                 | -0.000661496      |
| Crow population                                         | 0.133084805                           | 0.133882418                                 | -0.000797613      |
